# Supplementary material for: Temporal transcriptome and metabolite analyses provide insights into the biochemical and physiological processes underlying endodormancy release in pistachio (Pistacia vera L.) flower buds
Source: Frontiers journal article supplement (doi:10.3389/fpls.2023.1240442), 2023-09-22
Supplement: Presentation_4.PDF [file Presentation_4.PDF]

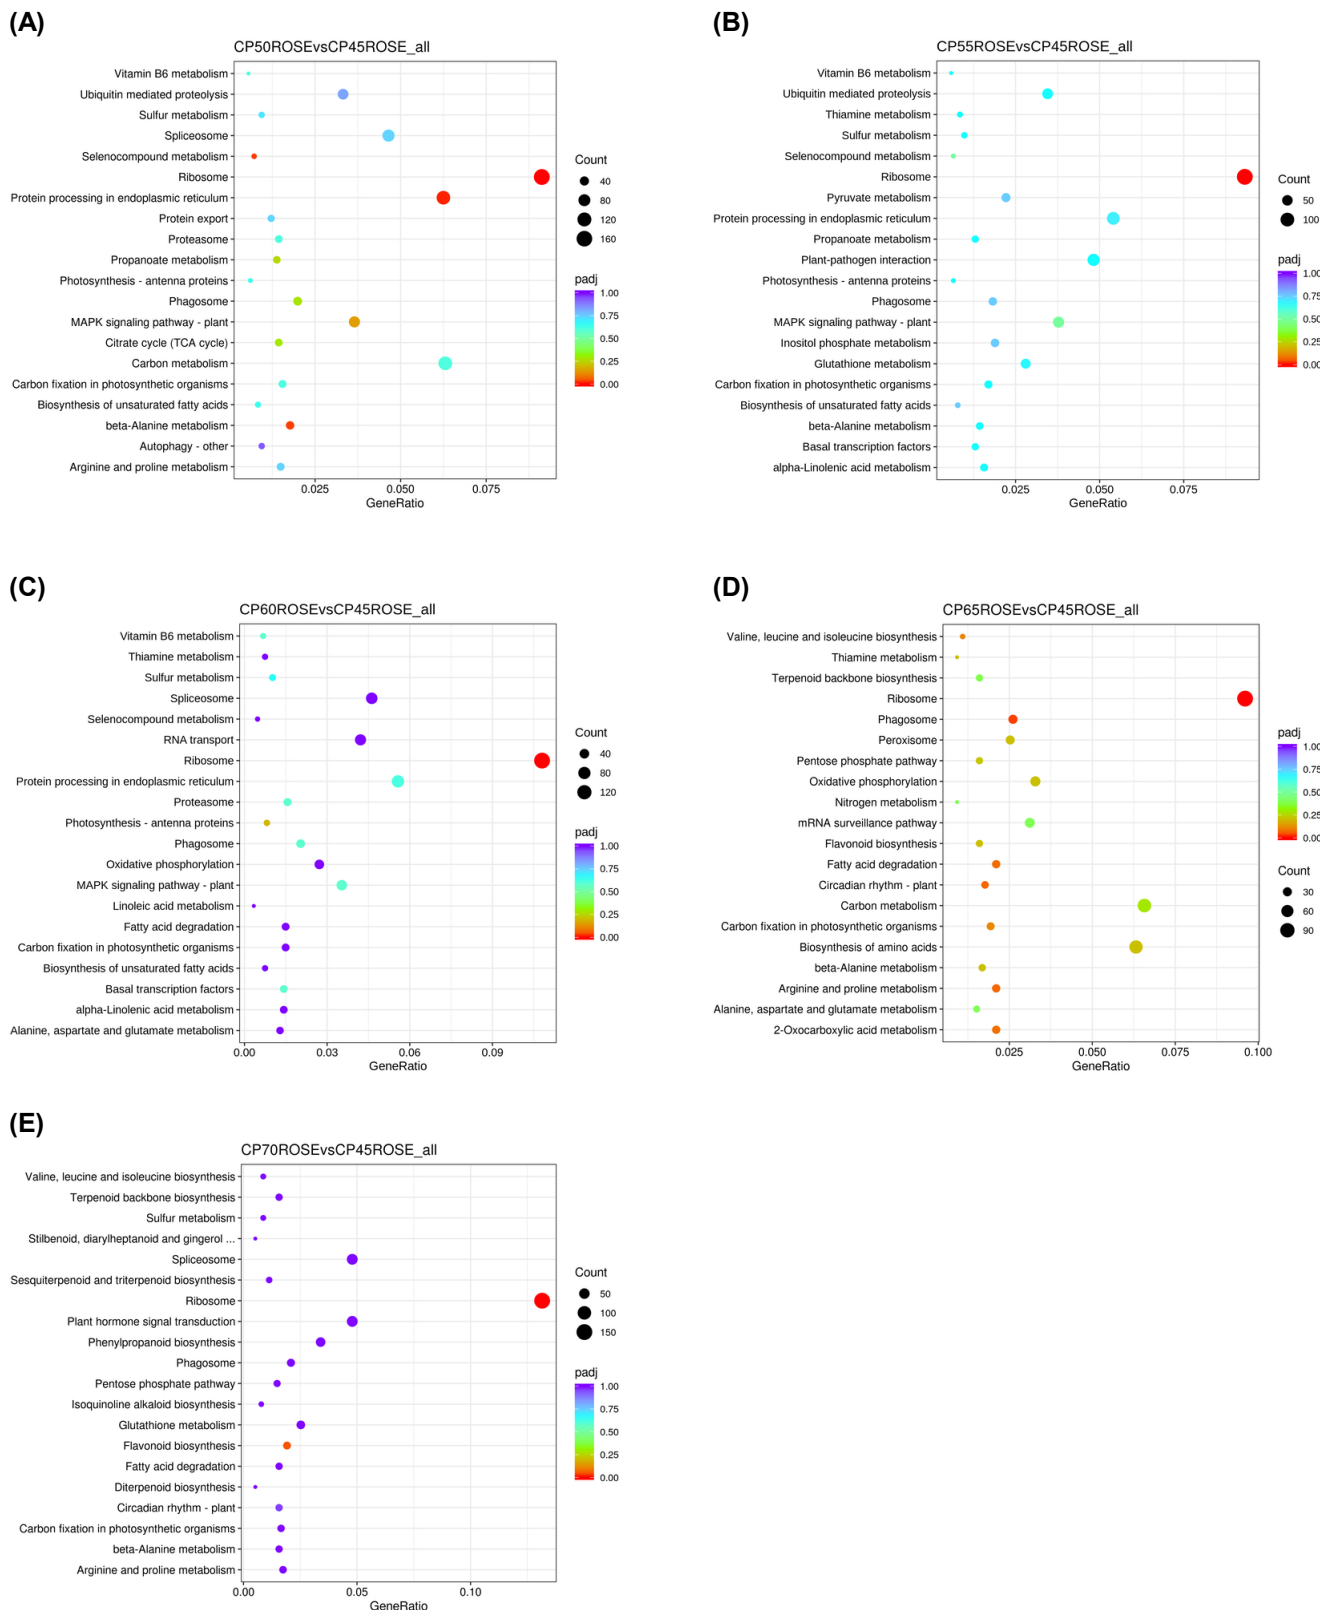

**Figure S4.** Kyoto Encyclopedia of Genes and Genomes (KEGG) pathway enrichment analysis for differentially expressed genes (DEGs) in buds collected at the Rose orchard. The size of the dot indicates the number of DEGs in the specific pathway, whereas the color of the dot represents the adjusted  $p$  value of the enrichment gene ratio (DEGs in the specific pathway/total DEGs).
